# Supplementary material
Source: PubMed Central journal article supplement (PMC4268501)

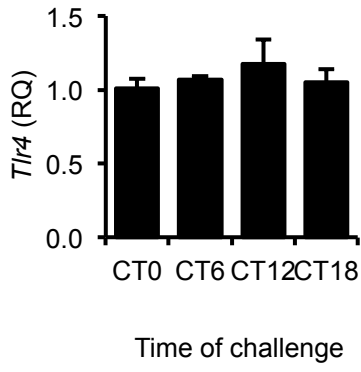

Supplement: NIHMS61427-supplement-Figure_S1.pdf [file NIHMS61427-supplement-Figure_S1.pdf]

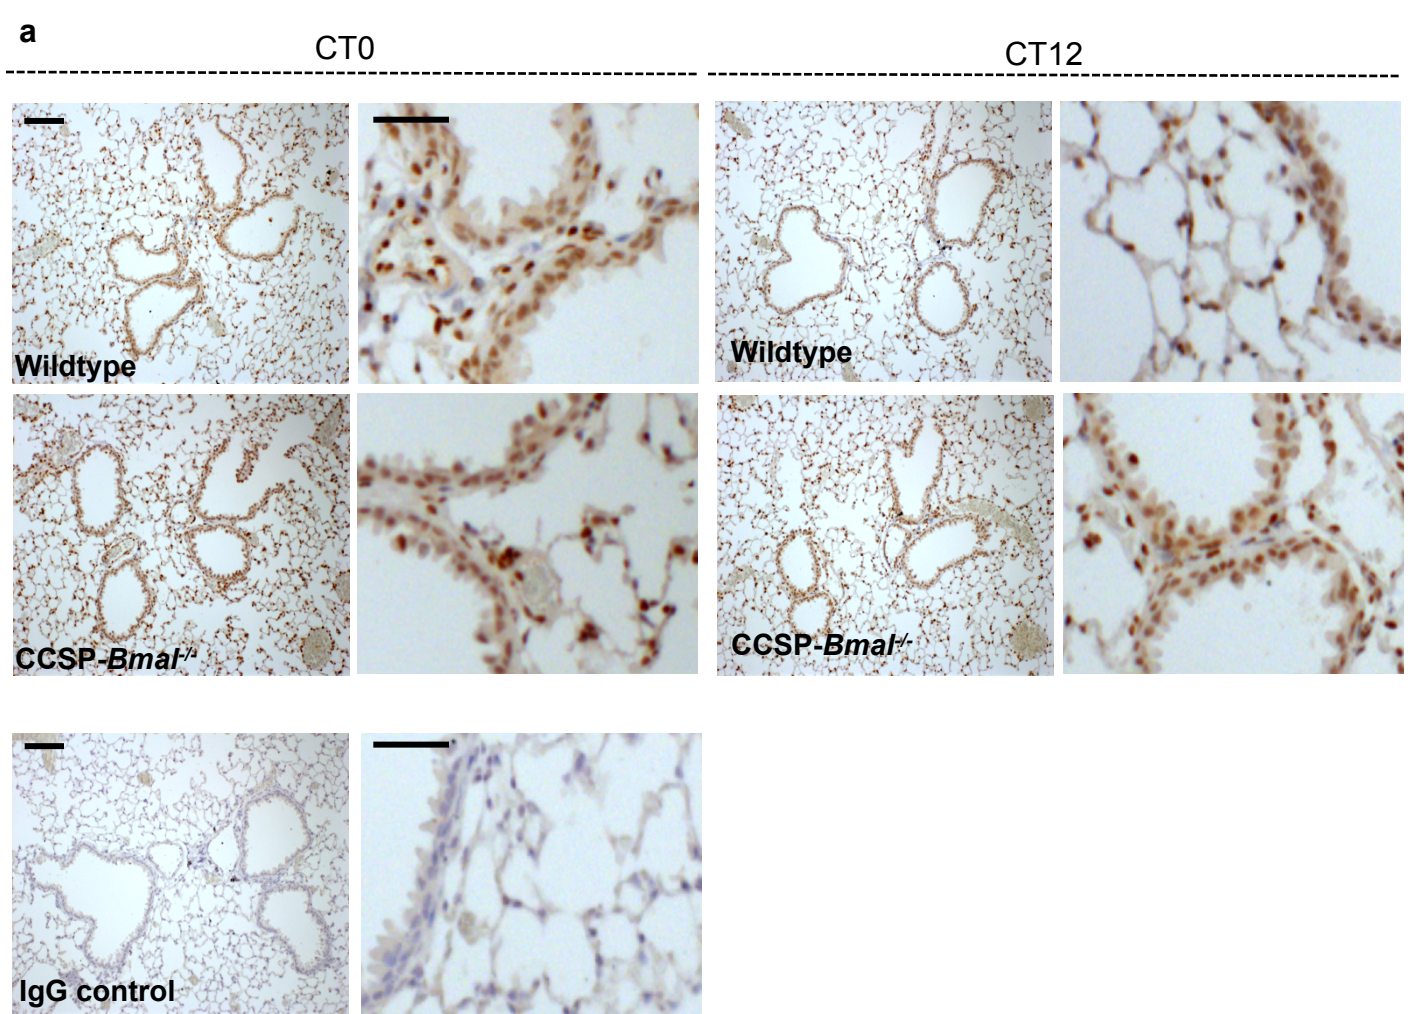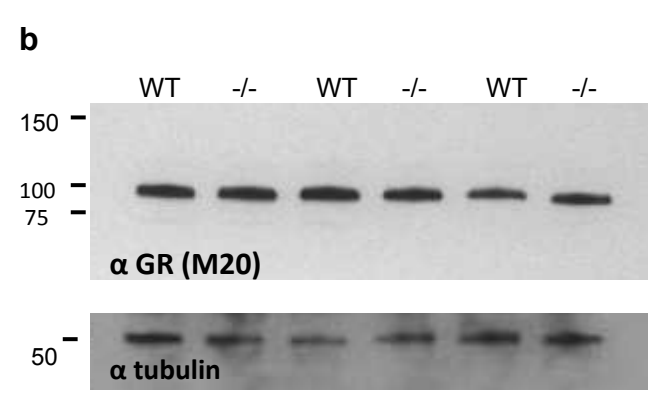

Supplement: NIHMS61427-supplement-Figure_S12.pdf [file NIHMS61427-supplement-Figure_S12.pdf]

Alveolar parenchyma

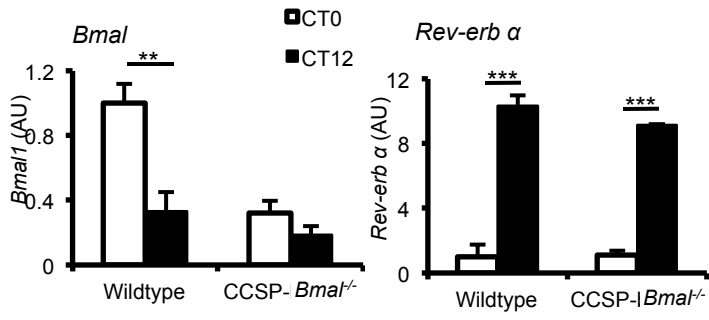

Supplementary Figure 4:

Supplement: NIHMS61427-supplement-Figure_S4.pdf [file NIHMS61427-supplement-Figure_S4.pdf]
